# Supplementary material
Source: MDPI journal article supplement (https://www.mdpi.com/1420-3049/26/18/5648)
Supplement: s1 [file s1]

Archive with 1 entries (1 files):
- molecules-1355801-Correction_Supplementary Materials_Tanaka et al.pdf
